# Supplementary material for: SCMMTP: identifying and characterizing membrane transport proteins using propensity scores of dipeptides
Source: PubMed Central journal article supplement (PMC4682407; doi:10.1186/1471-2164-16-s12-s6), 2015-12-09
Supplement: 1471-2164-16-S12-S6-S1.pdf [file 1471-2164-16-S12-S6-S1.pdf]

**Table S1 - Performance comparison of MTP predictors on the training set**

| <b>Method</b>           | <b>Acc (%)</b> | <b>Sensitivity (%)</b> | <b>Specificity (%)</b> | <b>MCC</b> |
|-------------------------|----------------|------------------------|------------------------|------------|
| <b>Bayes-AAC</b>        | 69.30          | 74.87                  | 62.04                  | 0.37       |
| <b>Bayes-DPC</b>        | 71.04          | 78.33                  | 61.54                  | 0.41       |
| <b>Bayes-AAindex</b>    | 67.20          | 73.46                  | 59.03                  | 0.33       |
| <b>Bayes-PSSM</b>       | 73.88          | 85.77                  | 58.36                  | 0.46       |
| <b>J48-AAC</b>          | 68.00          | 72.56                  | 62.04                  | 0.35       |
| <b>J48-DPC</b>          | 62.26          | 67.56                  | 55.35                  | 0.23       |
| <b>J48-AAindex</b>      | 67.49          | 69.23                  | 65.22                  | 0.34       |
| <b>J48-PSSM</b>         | 69.88          | 74.62                  | 63.71                  | 0.38       |
| <b>KNN-AAC(k=7)</b>     | 70.54          | 86.28                  | 50.00                  | 0.39       |
| <b>KNN-DPC(k=5)</b>     | 64.08          | 87.82                  | 33.11                  | 0.25       |
| <b>KNN-AAindex(k=7)</b> | 71.99          | 79.87                  | 61.71                  | 0.42       |
| <b>KNN-PSSM(k=13)</b>   | 73.88          | 85.77                  | 58.36                  | 0.46       |
| <b>SVM-AAC</b>          | 75.69          | 78.64                  | 71.88                  | 0.51       |
| <b>SVM-DPC</b>          | 72.71          | 75.44                  | 69.01                  | 0.44       |
| <b>SVM-AAindex</b>      | 76.27          | 78.10                  | 72.28                  | 0.50       |
| <b>SVM-PSSM</b>         | 76.63          | 80.32                  | 72.30                  | 0.53       |
| <b>SCMMTP</b>           | 81.12          | 83.76                  | 77.68                  | 0.62       |
| <b>Mean</b>             | 71.29          | 78.38                  | 61.98                  | 0.41       |
