# Supplementary material for: SCMMTP: identifying and characterizing membrane transport proteins using propensity scores of dipeptides
Source: PubMed Central journal article supplement (PMC4682407; doi:10.1186/1471-2164-16-s12-s6), 2015-12-09
Supplement: 1471-2164-16-S12-S6-S2.pdf [file 1471-2164-16-S12-S6-S2.pdf]

**Table S2. 10 independent runs of SCMMTP on the training set**

| <b>Exp.</b> | <b>Fitness Score</b> | <b>Train Acc (%)</b> | <b>Sensitivity (%)</b> | <b>Specificity (%)</b> | <b>Threshold</b> |
|-------------|----------------------|----------------------|------------------------|------------------------|------------------|
| <b>1</b>    | 0.8899               | 81.71                | 0.85                   | 0.78                   | 476.88           |
| <b>2</b>    | 0.8880               | 81.64                | 0.83                   | 0.80                   | 486.71           |
| <b>3</b>    | 0.8871               | 80.70                | 0.83                   | 0.78                   | 497.11           |
| <b>4</b>    | 0.8867               | 81.20                | 0.81                   | 0.81                   | 504.76           |
| <b>5</b>    | 0.8860               | 81.06                | 0.84                   | 0.77                   | 475.41           |
| <b>6</b>    | 0.8854               | 81.28                | 0.84                   | 0.77                   | 497.57           |
| <b>7</b>    | 0.8851               | 80.55                | 0.86                   | 0.74                   | 481.35           |
| <b>8</b>    | 0.8849               | 80.62                | 0.80                   | 0.82                   | 497.82           |
| <b>9</b>    | 0.8849               | 81.28                | 0.85                   | 0.77                   | 498.12           |
| <b>10</b>   | 0.8836               | 81.13                | 0.87                   | 0.74                   | 494.12           |
| <b>Mean</b> | 0.8861               | 81.12                | 0.84                   | 0.78                   | 490.98           |
| <b>STDV</b> | 0.0017               | 0.38                 | 0.02                   | 0.03                   | 9.65             |
