# Supplementary material for: SCMMTP: identifying and characterizing membrane transport proteins using propensity scores of dipeptides
Source: PubMed Central journal article supplement (PMC4682407; doi:10.1186/1471-2164-16-s12-s6), 2015-12-09
Supplement: 1471-2164-16-S12-S6-S3.pdf [file 1471-2164-16-S12-S6-S3.pdf]

**Table S3. Amino acid propensity scores and composition in MTP and non-MTP**

| <b>Amino acid</b> | <b>MTP propensity Score (Rank)</b> | <b>Composition of MTP: A (%)</b> | <b>Composition of non-MTP: B (%)</b> | <b>Composition difference: A-B (%)</b> |
|-------------------|------------------------------------|----------------------------------|--------------------------------------|----------------------------------------|
| <b>I-Ile</b>      | 571.9 (1)                          | 6.64                             | 5.40                                 | 1.24                                   |
| <b>F-Phe</b>      | 566.6 (2)                          | 5.51                             | 4.43                                 | 1.08                                   |
| <b>G-Gly</b>      | 552.8 (3)                          | 7.03                             | 6.00                                 | 1.03                                   |
| <b>V-Val</b>      | 526.1 (4)                          | 7.11                             | 6.30                                 | 0.81                                   |
| <b>A-Ala</b>      | 521.4 (5)                          | 7.82                             | 7.00                                 | 0.81                                   |
| <b>M-Met</b>      | 520.9 (6)                          | 2.79                             | 2.29                                 | 0.50                                   |
| <b>L-Leu</b>      | 490.2 (7)                          | 11.08                            | 10.55                                | 0.53                                   |
| <b>T-Thr</b>      | 469.7 (8)                          | 5.53                             | 5.36                                 | 0.17                                   |
| <b>C-Cys</b>      | 468.5 (9)                          | 1.61                             | 1.65                                 | -0.04                                  |
| <b>Y-Tyr</b>      | 460.1 (10)                         | 3.19                             | 3.17                                 | 0.02                                   |
| <b>S-Ser</b>      | 433.5 (11)                         | 7.69                             | 8.28                                 | -0.59                                  |
| <b>N-Asn</b>      | 424.7 (12)                         | 3.87                             | 4.27                                 | -0.40                                  |
| <b>E-Glu</b>      | 422.8 (13)                         | 5.19                             | 6.15                                 | -0.96                                  |
| <b>R-Arg</b>      | 415.6 (14)                         | 4.53                             | 5.19                                 | -0.66                                  |
| <b>W-Trp</b>      | 411.6 (15)                         | 1.50                             | 1.53                                 | -0.03                                  |
| <b>D-Asp</b>      | 407.8 (16)                         | 4.15                             | 4.89                                 | -0.75                                  |
| <b>Q-Gln</b>      | 407.1 (17)                         | 3.57                             | 4.29                                 | -0.72                                  |
| <b>H-His</b>      | 398.4 (18)                         | 1.89                             | 2.37                                 | -0.48                                  |
| <b>K-Lys</b>      | 398.3 (19)                         | 4.78                             | 5.65                                 | -0.87                                  |
| <b>P-Pro</b>      | 396.4 (20)                         | 4.54                             | 5.23                                 | -0.68                                  |
| <b>R</b>          | 1.00                               | 0.46                             | 0.18                                 | 0.95                                   |
